# Supplementary material
Source: Springer Nature journal article supplement (https://www.springermedizin.de/resource/supplementary/12935_2009_215_MOESM4_ESM.pdf/9541334)

\*MDA MB 231

\*CaCO2

\*LoVo

\*MCF7

\*RKO

\*SW480

\*SW48

MCH 064

RPF3

MCH 065

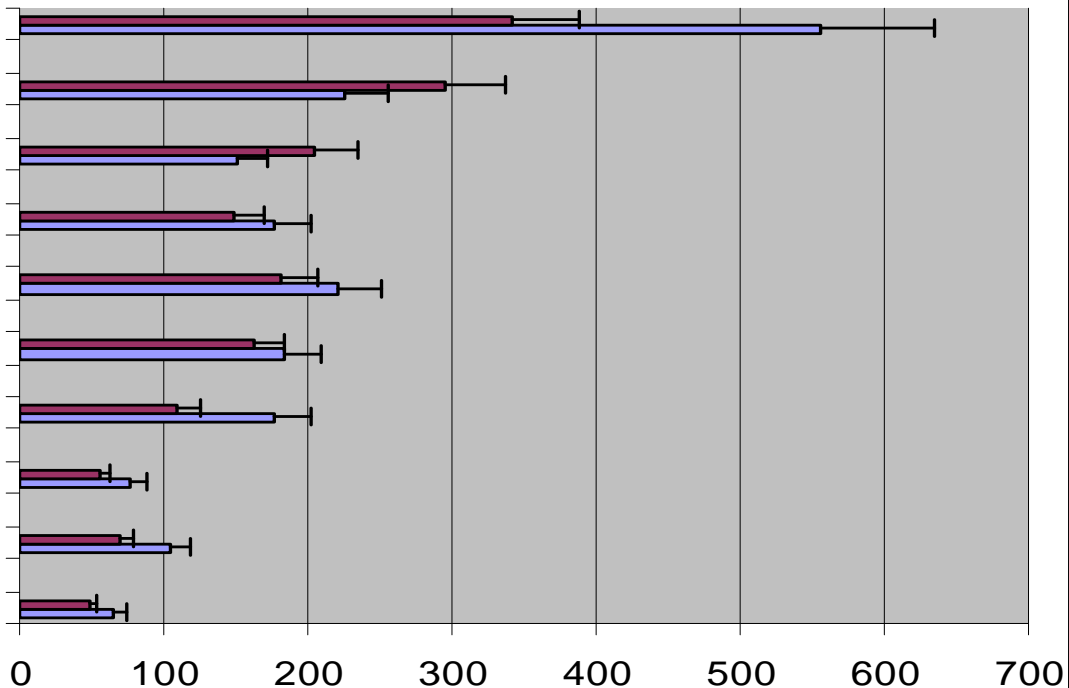

**UCP2 Optical Density**

Supplement: MOESM4 [file 9541334]
